# Supplementary material
Source: Springer Nature journal article supplement (https://www.springermedizin.de/resource/supplementary/12894_2006_93_MOESM5_ESM.pdf/9513944)

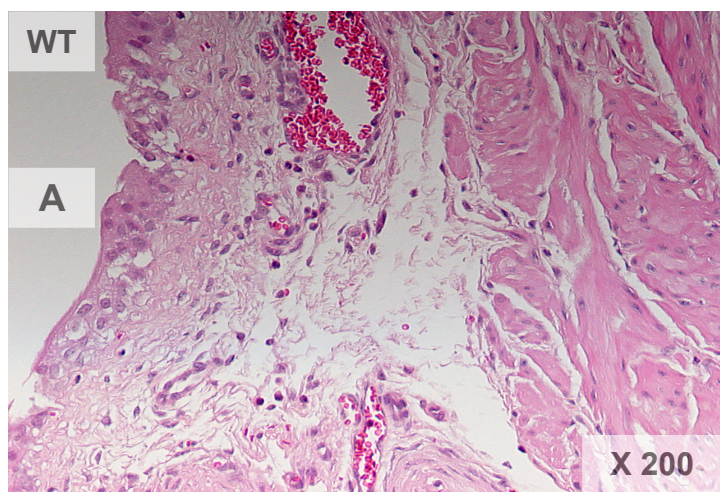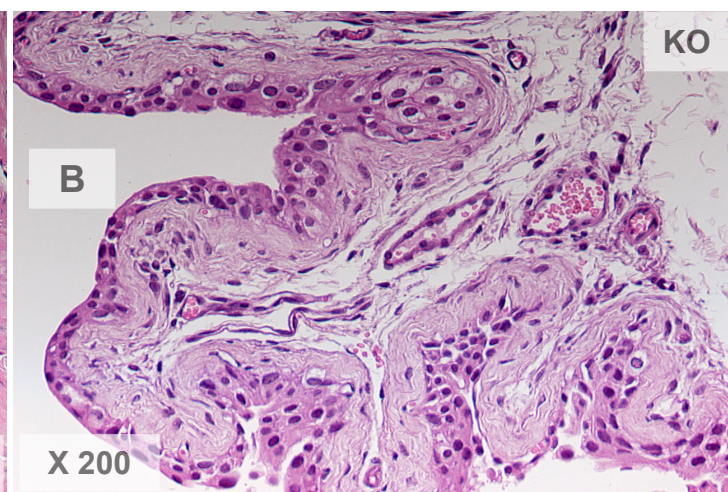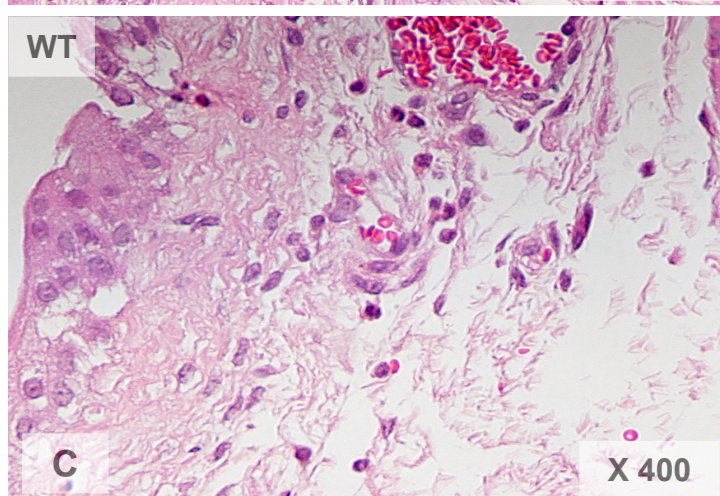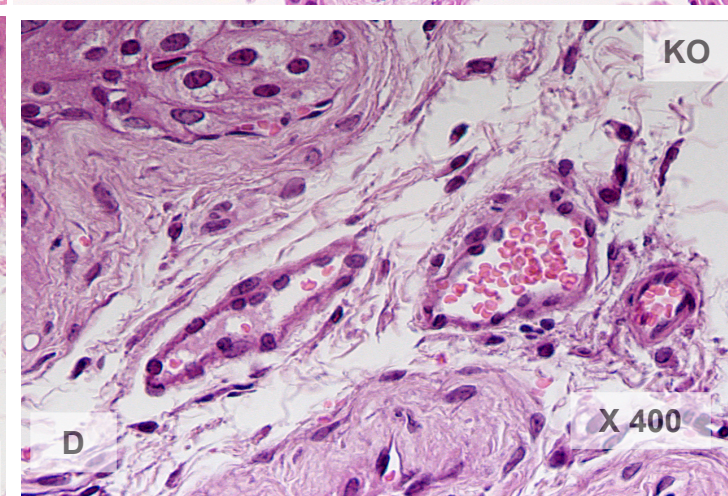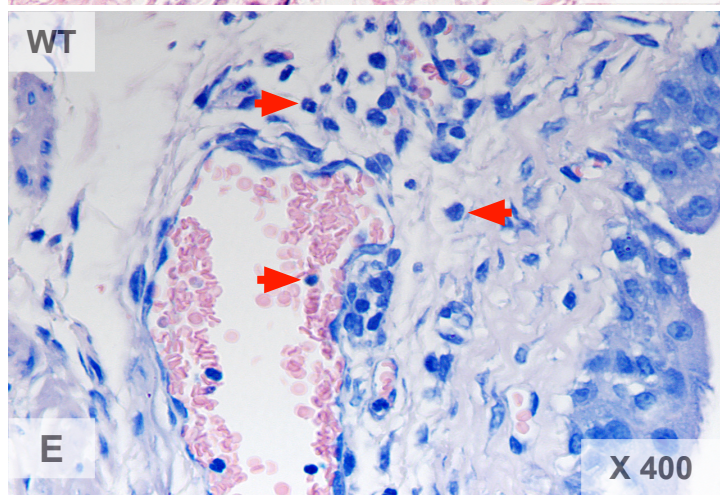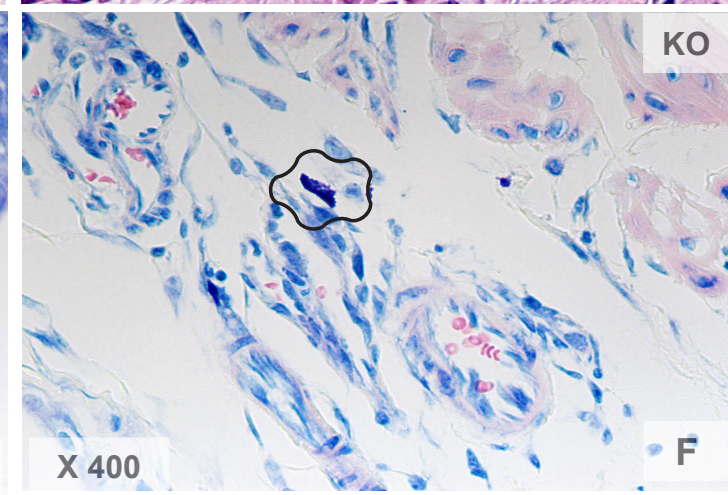

Supplement: MOESM5 [file 9513944]
